# Supplementary material for: Direct observation of reverse intersystem crossing from fully confined triplet exciplexes using magneto-electroluminescence
Source: Royal Society of Chemistry journal article supplement (doi:10.1039/c9tc02896j), 2019-01-01
Supplement: c9tc02896j1.pdf [file c9tc02896j1.pdf]

1    **Supporting Information**

2    **Direct observation of reverse intersystem crossing from fully confined triplet**  
3    **exciplexes using magneto-electroluminescence**

4    Xi Zhao, Xiantong Tang, Ruiheng Pan, Jing Xu, Fenlan Qu, and Zuhong Xiong\*

5    Prof. Z. H. Xiong  
6    School of Physical Science and Technology  
7    Southwest University  
8    Chongqing 400715, P. R. China  
9    E-mail: zhxiong@swu.edu.cn

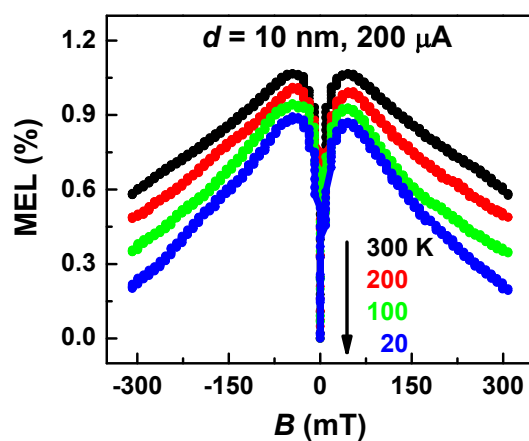

10 **Fig. S1** MEL curves from the PE-OLEDs with  $d = 10$  nm (injection current =  $200 \mu\text{A}$ )  
 11 at different temperatures.

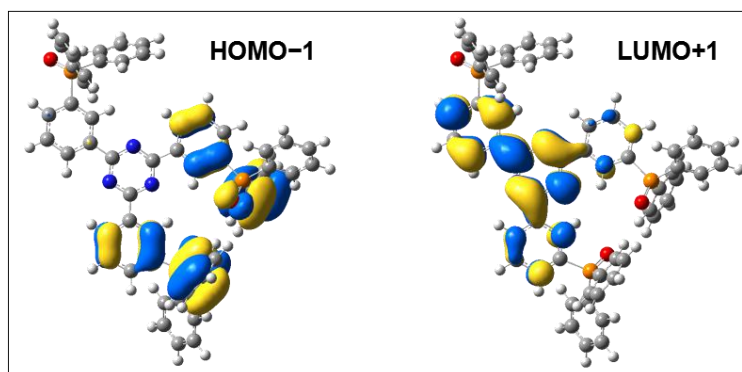

12 **Fig. S2** The HOMO-1 and LUMO+1 of the PO-T2T molecule that were calculated  
 13 using the density functional theory based on B3LYP.
